# Supplementary material for: The Debugging Decay Index: Rethinking Debugging Strategies for Code LLMs
Source: Research Square preprint supplement (doi:10.21203/rs.3.rs-6955423/v1), 2025-09-12
Supplement: Supplementary file 1 [file 320187d93fd988d0def4ac24.pdf]

# The Debugging Decay Index: Rethinking Debugging Strategies for Code LLMs

## Appendix

### DDI Pseudocode

---

**Algorithm 1** Debugging Decay Index (DDI) Calculation

---

**Input:** Debugging results CSV, threshold values  $\theta$ , fresh start count  $\phi$

**Output:** DDI tuple  $(E_0, \lambda, t_\theta, R^2)$

**Procedure:**

- 1: **Data Preprocessing:**
  - 2: Calculate normalized effectiveness:  $I_i = S_i/N_i$  for each attempt  $i$
  - 3: Where  $S_i$  = problems solved at attempt  $i$ ,  $N_i$  = problems remaining at attempt  $i$
  - 4: Set  $E_0 = I_0$  (initial effectiveness)
  - 5: **Exponential Decay Fitting:**
  - 6: **if** sufficient data points ( $n \geq 3$ ) **then**
  - 7:     Fit  $E(t) = E_0 \cdot e^{-\lambda t}$  using nonlinear least squares regression
  - 8:     Extract decay constant  $\lambda$  and calculate  $R^2$  goodness-of-fit
  - 9: **else**
  - 10:     Set  $\lambda = \text{None}$ ,  $t_\theta = []$
  - 11: **end if**
  - 12: **Intervention Point Calculation:**
  - 13: **if**  $\lambda \neq \text{None}$  **then**
  - 14:     **for** each threshold  $\theta_j \in \theta$  **do**
  - 15:         Calculate  $t_{\theta_j} = \lceil \frac{\ln(100/(100-\theta_j))}{\lambda} \rceil$
  - 16:     **end for**
  - 17: **end if**
  - 18: **Return**  $(E_0, \lambda, t_\theta, R^2)$
-
